# Supplementary material for: New deep data hiding and extraction algorithm using multi-channel with multi-level to improve data security and payload capacity
Source: PeerJ Comput Sci. 2022 Oct 19;8:e1115. doi: 10.7717/peerj-cs.1115 (PMC9680874; doi:10.7717/peerj-cs.1115)
Supplement: Supplemental Information 9 [file peerj-cs-08-1115-s009.xlsx]

## Sheet: PSNR
512x384 Image	PSNR	SSIM
ucid00001	55.9941	0.9986
ucid00002	55.308	0.9994
ucid00003	54.1057	0.9996
ucid00004	53.2163	0.9994
ucid00005	53.0025	0.9995
ucid00006	53.462	0.9994
ucid00007	54.3648	0.9995
ucid00008	54.8134	0.9992
ucid00009	57.1277	0.9995
ucid00010	53.4873	0.9994
ucid00011	55.1495	0.9991
ucid00012	55.3057	0.9994
ucid00013	54.6395	0.9991
ucid00014	53.8039	0.9995
ucid00015	57.0872	0.9988
ucid00016	55.2374	0.9991
ucid00017	53.9219	0.9993									0
ucid00018	56.3614	0.9996
ucid00019	54.267	0.9996
ucid00020	53.7011	0.9994
ucid00021	53.8186	0.9995
ucid00022	52.781	0.9996
ucid00023	53.7817	0.9995
ucid00024	53.2246	0.9995
ucid00025	54.3351	0.9995
ucid00026	53.4233	0.9993
ucid00027	55.3678	0.9992
ucid00028	55.0398	0.9993
ucid00029	53.6779	0.9994
ucid00030	53.6779	0.9994
ucid00031	53.0076	0.9997
ucid00032	54.266	0.9992
ucid00033	55.5357	0.9989
ucid00034	53.8269	0.9994
ucid00035	54.6175	0.9997
ucid00036	53.684	0.9994
ucid00037	52.5475	0.9996
ucid00038	55.523	0.9991
ucid00039	56.6454	0.999
ucid00040	57.1272	0.9994
ucid00041	55.7182	0.9996
ucid00042	55.7633	0.9996
ucid00043	54.9751	0.9996
ucid00044	56.7229	0.9994
ucid00045	55.1227	0.9998
ucid00046	56.2009	0.9998
ucid00047	57.9114	0.9998
ucid00048	55.9474	0.9997
ucid00049	56.4738	0.9998
ucid00050	55.8057	0.9998

## Sheet: NCC
lena	size	NCC		Baboon	size	NCC		Peppers	size	NCC
	20000		1		20000	1			20000	1
			1			1				1
			1			1				1
			1			1				1
			1			1				1
	60000		0.9999		28000	1			40000	1
			0.9999			1				0.9999
			0.999933			1				0.999967
			1			1				1
	80000		0.9999		36000	1			60000	1
			0.9999			1				0.9999
			0.999933			1				0.999967
			1			1				1
	120000		0.9999		44000	0.9999			80000	1
			0.9999			1				0.9998
			0.999933			0.999967
			1			1				1
	150000		0.9998		56000	0.9999			105000	1
			0.9998			0.9999				0.9998
			0.999867			0.999933				0.999933
