# Supplementary material for: New deep data hiding and extraction algorithm using multi-channel with multi-level to improve data security and payload capacity
Source: PeerJ Comput Sci. 2022 Oct 19;8:e1115. doi: 10.7717/peerj-cs.1115 (PMC9680874; doi:10.7717/peerj-cs.1115)
Supplement: Supplemental Information 12 [file peerj-cs-08-1115-s012.xlsx]

## Sheet: Sheet1
Color Stego-image	Payload Capacity %	VIF
Lena	0.1	0.95
Peppers	0.3	0.92
Baboon	0.4	0.9
